# Supplementary material
Source: publisher site journal article supplement (https://www.dovepress.com/article/309132)

## Rev-Supplementary Figure 1

**A**

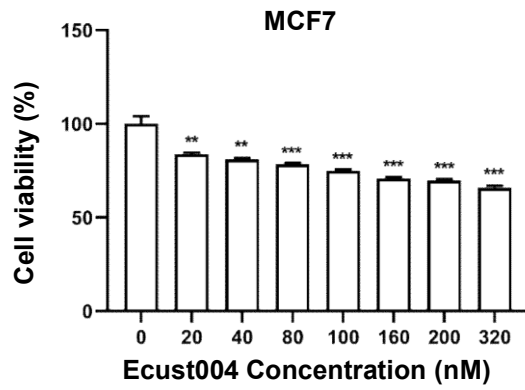

**D**

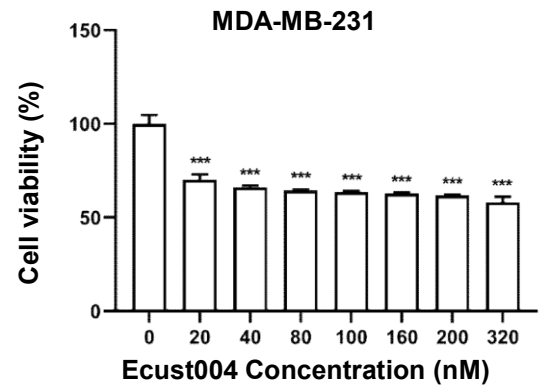

**B**

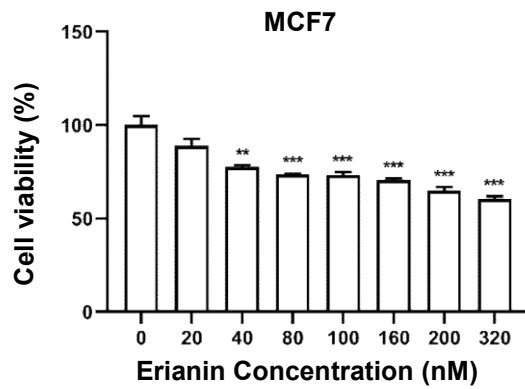

**E**

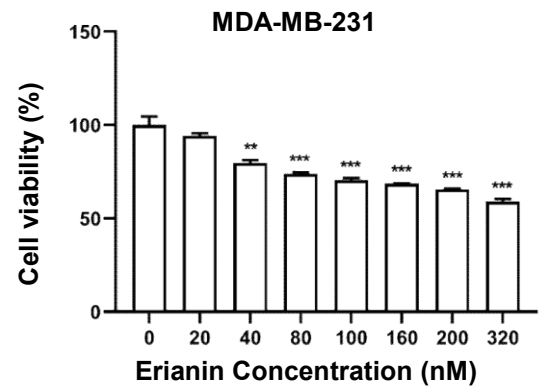

**C**

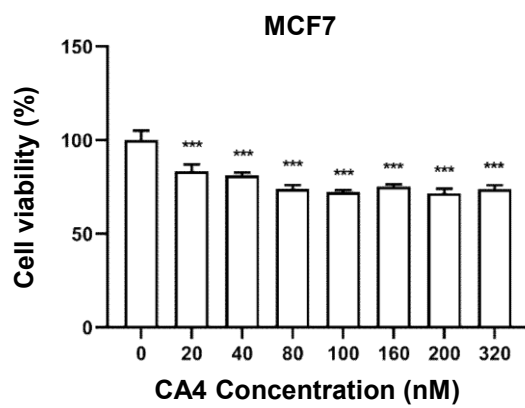

**F**

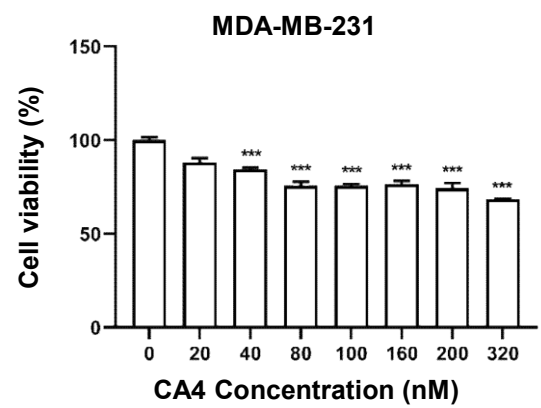

Supplement: Supplementary file 1 [file 309132-Revised-Figure-S1.pdf › 309132-Revised-Figure-S1.pdf]

## Rev-Supplementary Figure 2

**A**

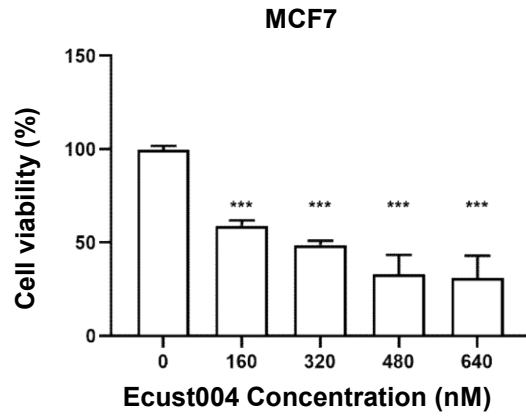

**C**

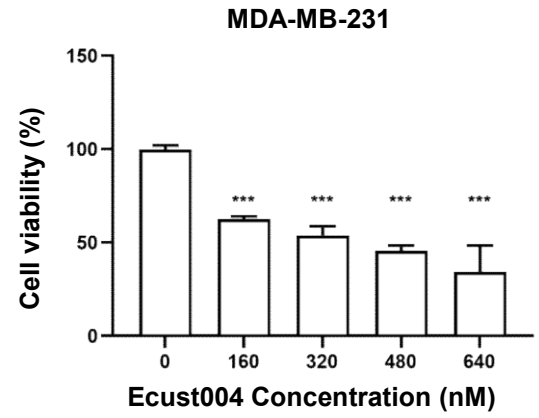

**B**

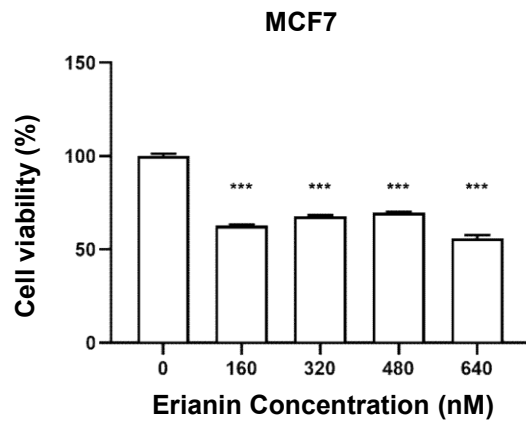

**D**

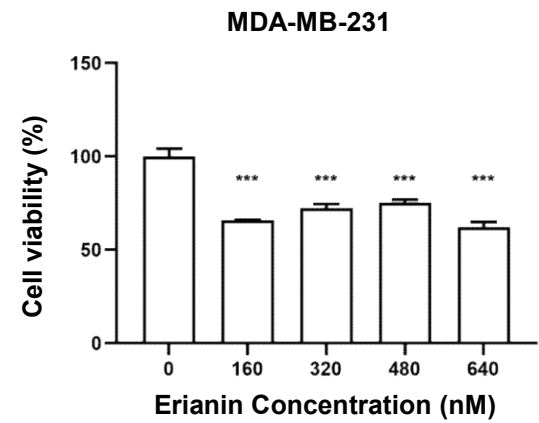

Supplement: Supplementary file 2 [file 309132-Revised-Figure-S2.pdf › 309132-Revised-Figure-S2.pdf]

# Rev-Supplementary Figure 3

**A**

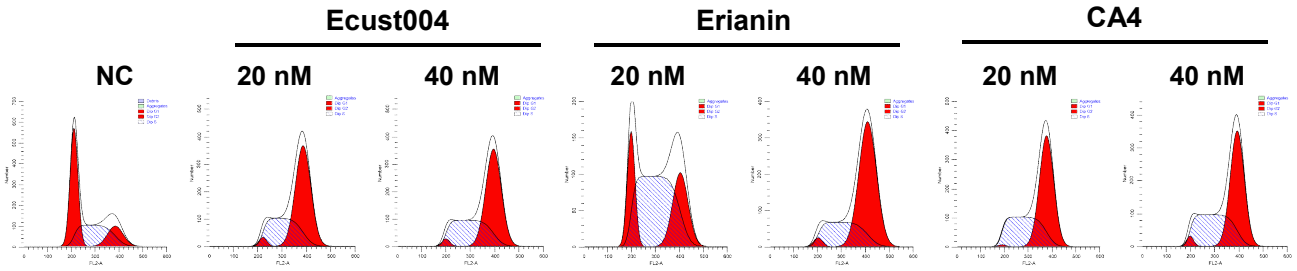

**B**

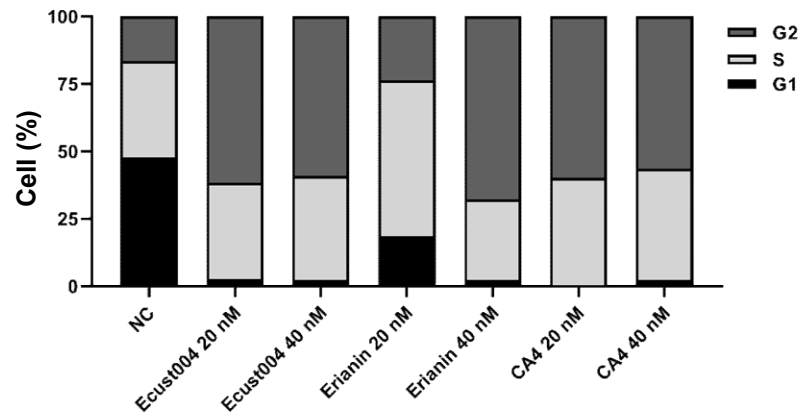

**C**

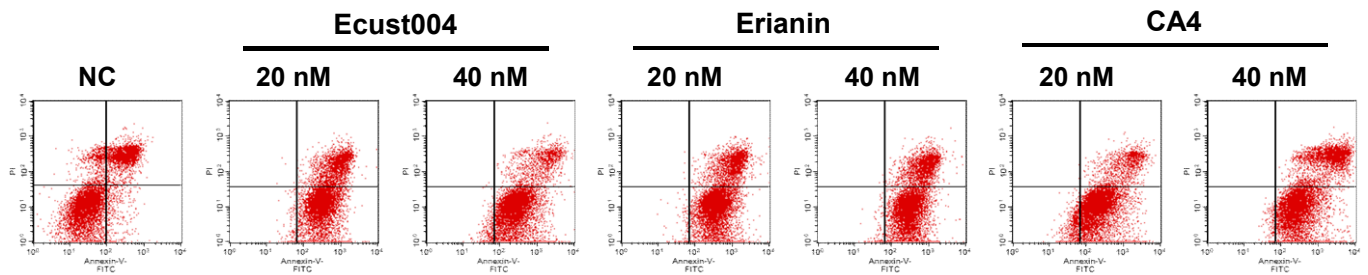

**D**

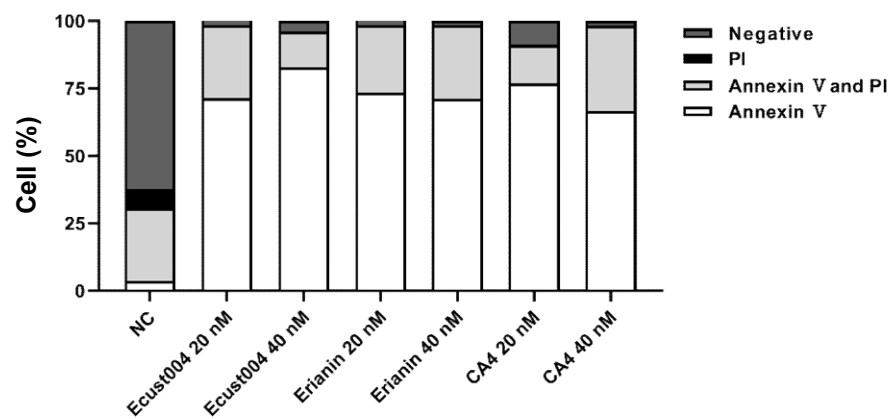

Supplement: Supplementary file 3 [file 309132-Revised-Figure-S3.pdf › 309132-Revised-Figure-S3.pdf]
